# Supplementary material for: Entangled dynamos and Joule heating in the Earth's ionosphere
Source: Copernicus journal article supplement (doi:10.5194/angeo-38-1019-2020), 2020-09-24
Supplement: Supplementary file 1 [file angeo-38-1019-2020-supplement.zip]

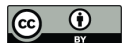

## *Supplement of*

# **Entangled dynamos and Joule heating in the Earth's ionosphere**

**Stephan C. Buchert**

*Correspondence to:* Stephan C. Buchert ([scb@irfu.se](mailto:scb@irfu.se))

- [angeo-38-1019-2020-supplement-title-page.pdf](#)
- [ns3d\\_rev2.html](#)

The copyright of individual parts of the supplement might differ from the CC BY 4.0 License.
